# Supplementary material
Source: PubMed Central journal article supplement (PMC3615032)
Supplement: NIHMS424774-supplement-supplement_1.pdf [file NIHMS424774-supplement-supplement_1.pdf]

**Supplemental Table 1. Characteristics of women in the NSFG survey by their eligibility for inclusion in the current duration sample**

| Characteristics                    | Inclusion in current duration sample |            |                           |            |                           |            | p-value |
|------------------------------------|--------------------------------------|------------|---------------------------|------------|---------------------------|------------|---------|
|                                    | Yes (group 1) <sup>a</sup>           |            | No (group 2) <sup>b</sup> |            | No (group 3) <sup>c</sup> |            |         |
|                                    | N                                    | Weighted % | N                         | Weighted % | N                         | Weighted % |         |
| <b>Total<sup>d</sup></b>           | 288                                  | 3.5        | 446                       | 5.2        | 6,909                     | 91.3       | -       |
| <b>Sociodemographic</b>            |                                      |            |                           |            |                           |            |         |
| Age (y)                            |                                      |            |                           |            |                           |            |         |
| 15-24                              | 50                                   | 13.6       | 113                       | 33.1       | 2,350                     | 24.6       | <0.001  |
| 25-29                              | 68                                   | 21.7       | 80                        | 14.7       | 1,148                     | 15.6       |         |
| 30-34                              | 73                                   | 30.2       | 68                        | 16.3       | 1,214                     | 13.8       |         |
| 35-39                              | 57                                   | 20.8       | 74                        | 17.4       | 1,139                     | 19.4       |         |
| 40-44                              | 40                                   | 13.7       | 111                       | 18.4       | 1,058                     | 26.6       |         |
| Relationship status                |                                      |            |                           |            |                           |            |         |
| Married                            | 215                                  | 81.8       | 193                       | 48.6       | 2,672                     | 44.5       | <0.001  |
| Cohabiting                         | 37                                   | 10.9       | 61                        | 15.6       | 634                       | 8.6        |         |
| Not cohabiting                     | 36                                   | 7.2        | 192                       | 35.8       | 3,603                     | 46.9       |         |
| Race and Hispanic origin           |                                      |            |                           |            |                           |            |         |
| Non-Hispanic white                 | 155                                  | 67.3       | 202                       | 59.0       | 3,782                     | 66.0       | 0.06    |
| Non-Hispanic black                 | 41                                   | 10.2       | 118                       | 19.3       | 1,371                     | 13.8       |         |
| Non-Hispanic other                 | 15                                   | 4.7        | 22                        | 5.1        | 348                       | 5.7        |         |
| Hispanic                           | 77                                   | 17.7       | 104                       | 16.6       | 1,408                     | 14.6       |         |
| Education                          |                                      |            |                           |            |                           |            |         |
| 0-11                               | 66                                   | 17.8       | 147                       | 31.0       | 1,875                     | 26.0       | <0.001  |
| 12                                 | 69                                   | 22.6       | 121                       | 30.6       | 1,602                     | 23.0       |         |
| 13-15                              | 61                                   | 24.7       | 101                       | 21.4       | 1,913                     | 27.8       |         |
| 16+                                | 92                                   | 34.9       | 77                        | 17.0       | 1,519                     | 23.3       |         |
| Percent of poverty level           |                                      |            |                           |            |                           |            |         |
| ≥ 300                              | 136                                  | 54.6       | 143                       | 36.0       | 2,739                     | 41.6       | <0.001  |
| 150-299                            | 72                                   | 21.4       | 126                       | 26.8       | 1,986                     | 29.3       |         |
| < 150                              | 80                                   | 24.0       | 177                       | 37.2       | 2,184                     | 29.2       |         |
| Health Insurance                   |                                      |            |                           |            |                           |            |         |
| Any                                | 228                                  | 82.5       | 332                       | 78.3       | 5,777                     | 84.9       | <0.005  |
| None                               | 60                                   | 17.5       | 114                       | 21.7       | 1,132                     | 15.1       |         |
| <b>Reproductive History</b>        |                                      |            |                           |            |                           |            |         |
| Parity                             |                                      |            |                           |            |                           |            |         |
| Parous                             | 139                                  | 50.4       | 292                       | 65.3       | 3,982                     | 58.3       | 0.004   |
| Nulliparous                        | 149                                  | 49.6       | 154                       | 34.7       | 2,927                     | 41.7       |         |
| Pelvic Inflammatory Disease        |                                      |            |                           |            |                           |            |         |
| Never treated                      | 271                                  | 94.2       | 411                       | 93.6       | 6,546                     | 95.1       | 0.51    |
| Ever treated                       | 17                                   | 5.8        | 35                        | 6.4        | 363                       | 4.9        |         |
| Gynecologic disorders <sup>e</sup> |                                      |            |                           |            |                           |            |         |
| No                                 | 161                                  | 52.8       | 314                       | 66.3       | 5,012                     | 71.6       | <0.001  |
| Yes                                | 127                                  | 47.2       | 130                       | 33.7       | 1,886                     | 28.5       |         |
| Medical treatment for              |                                      |            |                           |            |                           |            |         |

|                   |     |      |     |      |       |      |        |
|-------------------|-----|------|-----|------|-------|------|--------|
| pregnancy         |     |      |     |      |       |      |        |
| Never             | 224 | 75.4 | 409 | 90.8 | 6,685 | 96.1 | <0.001 |
| Yes (current)     | 24  | 9.3  | 0   | 0    | 16    | 0.2  |        |
| Yes (not current) | 40  | 15.3 | 37  | 9.2  | 208   | 3.6  |        |

Note: All percentages and p-value estimates account for survey design

<sup>a</sup> **Group 1:** Includes women (or partners) who were eligible for the current duration analysis because they were at risk of pregnancy at the time of interview (i.e., sexually active, not using contraception, and not pregnant) and queried on their current duration of pregnancy attempt.

<sup>b</sup> **Group 2:** Includes women (or partners) who were at risk of pregnancy at the time of interview (i.e., sexually active, not using contraception, and not pregnant), but who reported they were not currently trying for pregnancy.

<sup>c</sup> **Group 3:** Includes women (or partners) who were not at risk of pregnancy at the time of interview because they were using contraception, surgically sterile, had a live or stillbirth within the past 3 months, or were not sexually active within the past 3 months.

<sup>d</sup> Weighted row percentages, all other values are column percentages

<sup>e</sup> Ever received a diagnosis of ovarian cysts, fibroids, endometriosis, or ovulation/menstruation problems
